# Supplementary figures and images for: Perfusion with cAMP analogue affects pheromone-sensitive trichoid sensilla of the hawkmothManduca sextain a time-dependent manner
Source: Oxford University Press journal article supplement (doi:10.1242/jeb.032839), 2010-02-12

**A**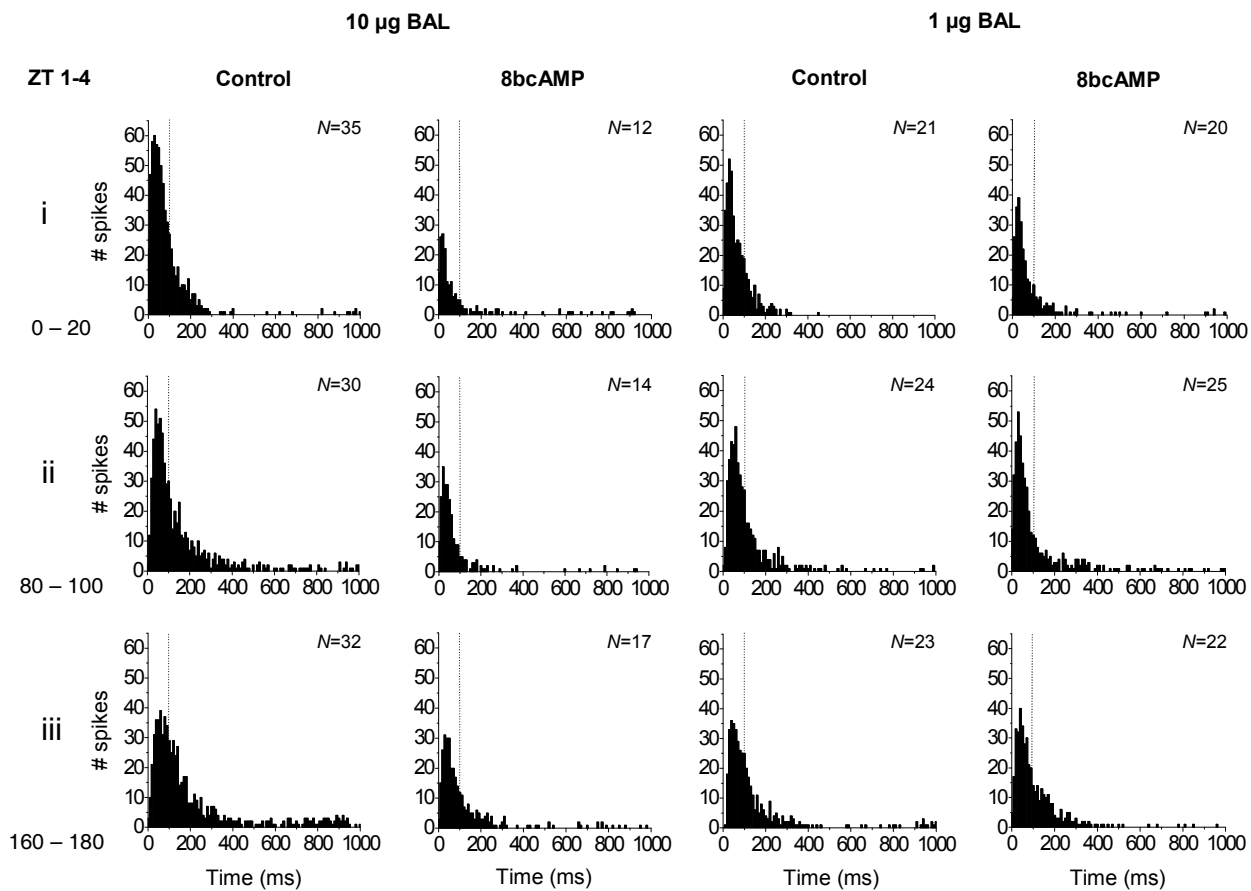**B**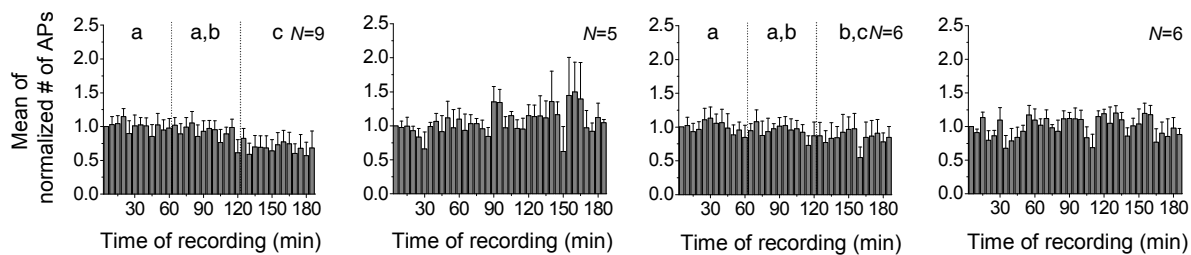

Supplement: jeb032839-sup-032839-figs1.pdf [file jeb032839-sup-032839-figs1.pdf]

ZT 8 - 11

10  $\mu$ g BAL

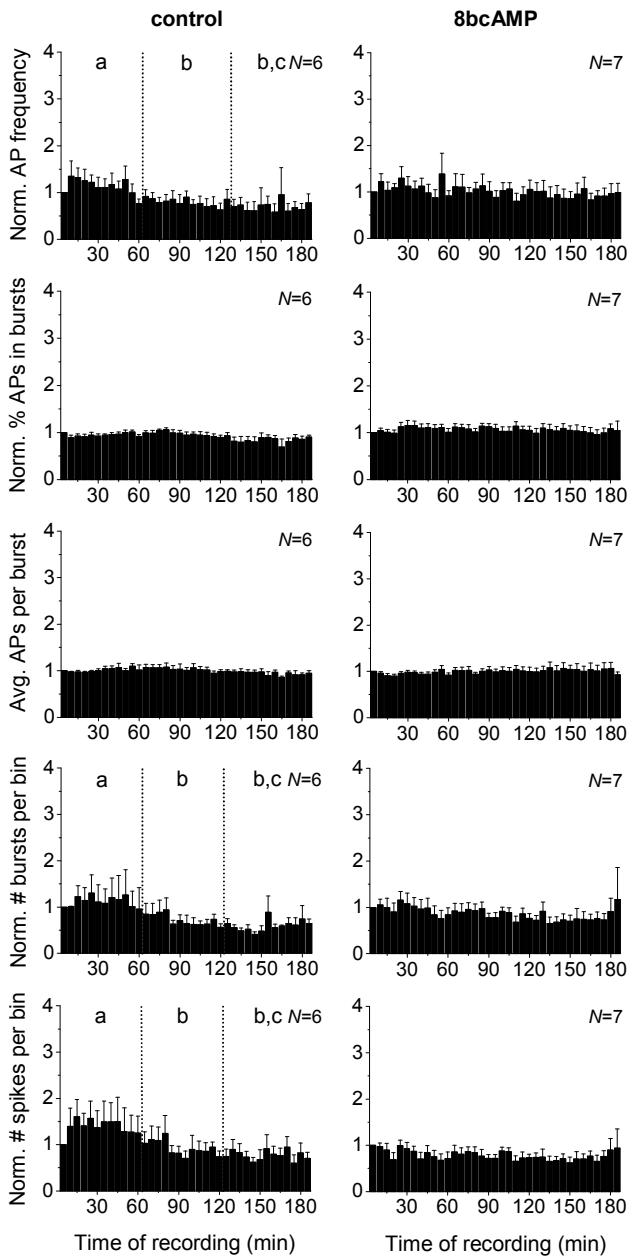

Supplement: jeb032839-sup-032839-figs2.pdf [file jeb032839-sup-032839-figs2.pdf]
